# Supplementary material for: Characterization of copulatory courtship song in the Old World sand fly species Phlebotomus argentipes
Source: PubMed Central journal article supplement (PMC7083918; doi:10.1038/s41598-020-61867-6), 2020-03-20

## Supplementary information

Manuscript: “Characterization of copulatory courtship song in the Old World sand fly species *Phlebotomus argentipes*”

Alejandra S. Araki, Reginaldo P. Brazil, James G.C. Hamilton, Felipe M. Vigoder

### Additional file 2

Primary and secondary song parameters of *Ph. argentipes*

| Individual | N | Primary song |    |        |           | Secondary song |        |
|------------|---|--------------|----|--------|-----------|----------------|--------|
|            |   | IPI (ms)     | NP | TL (s) | Freq (Hz) | Freq (Hz)      | TL (s) |
| 119_06     | 1 | 48.83        | 49 | 2.33   | 258.39    | 279.932        | 3079.4 |
| 120_01     | 1 | 58.51        | 50 | 2.87   | 333.77    | 258.398        | 2264.9 |
| 120_03     | 1 | 47.15        | 43 | 1.97   | 236.87    | 312.231        | 2183.5 |
| 120_06     | 1 | 64.57        | 62 | 3.92   | 183.03    | 301.465        | 3277.0 |
| 120_18     | 1 | 97.10        | 57 | 5.41   | 215.33    | 290.698        | 3051.6 |
| 120_19     | 1 | 58.62        | 82 | 4.73   | 290.69    | 333.765        | 3151.6 |
| 120_21     | 1 | 46.52        | 59 | 2.68   | 312.23    | 322.998        | 1443.1 |
| 121_02     | 1 | 44.79        | 83 | 3.66   | 247.63    | 301.465        | 1354.6 |
| 121_03     | 1 | 47.29        | 53 | 2.44   | 193.79    | 322.998        | 2668.0 |
| 121_06     | 1 | 43.22        | 56 | 2.37   | 172.27    | 344.531        | 2715.6 |
| 121_10     | 1 | 48.12        | 69 | 3.26   | 226.09    | 344.531        | 2583.7 |
| 121_11     | 1 | 67.75        | 47 | 3.10   | 204.57    | 344.531        | 873.3  |
| 121_12     | 1 | 41.27        | 44 | 1.76   | 333.77    | 313.129        | 1750.4 |

N, number of train per copula; IPI, inter-pulse interval; NP, pulses per train; TL, train length; Freq, the carrier of frequency of the pulse train.

### Additional file 3

Detail of trace of a sine song of the secondary song.

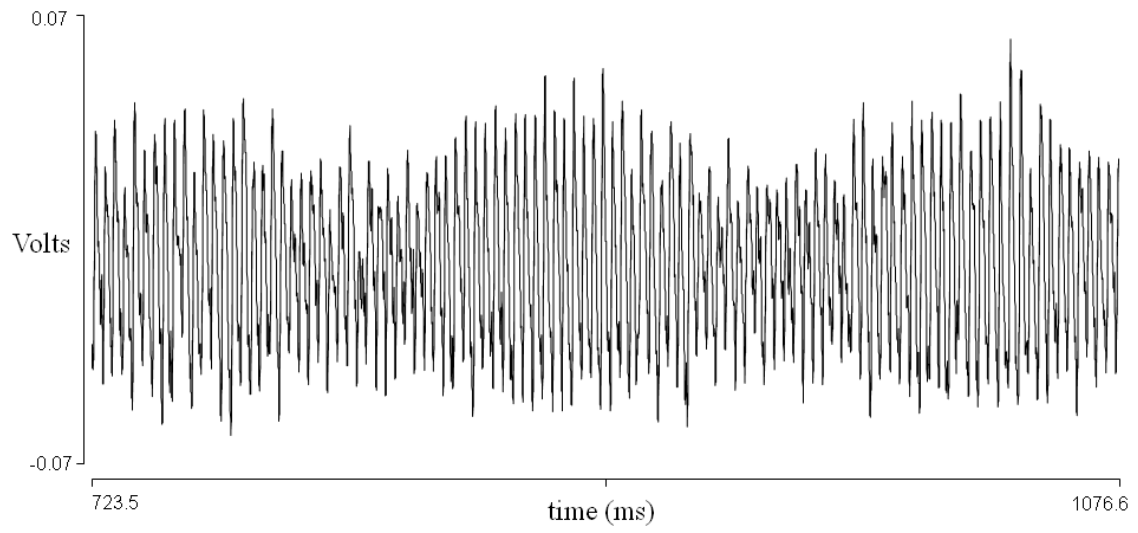

Supplement: 41598_2020_61867_MOESM2_ESM.pdf [file 41598_2020_61867_MOESM2_ESM.pdf]
